## 28 **Abstract**

29 The bacterial cell envelope is an essential structure that protects the cell from environmental  
30 threats, while simultaneously serving as communication interface and diffusion barrier.  
31 Therefore, maintaining cell envelope integrity is of vital importance for all microorganisms. Not  
32 surprisingly, evolution has shaped conserved protection networks that connect stress  
33 perception, transmembrane signal transduction and mediation of cellular responses upon cell  
34 envelope stress. The phage shock protein (PSP) stress response is one of such conserved  
35 protection networks. Most of the knowledge about the Psp response comes from studies in the  
36 Gram-negative model bacterium, *Escherichia coli* where the Psp system consists of several  
37 well-defined protein components. Homologous systems were identified in representatives of  
38 Proteobacteria, Actinobacteria, and Firmicutes; however, the Psp system distribution in the  
39 microbial world remains largely unknown. By carrying out a large-scale, unbiased comparative  
40 genomics analysis, we found components of the Psp system in many bacterial and archaeal  
41 phyla and demonstrated that the PSP system deviates dramatically from the proteobacterial  
42 prototype. Two of its core proteins, PspA and PspC, have been integrated in various (often  
43 phylum-specifically) conserved protein networks during evolution. Based on protein sequence  
44 and gene neighborhood analyses of *pspA* and *pspC* homologs, we built a natural classification  
45 system of PSP networks in bacteria and archaea. We performed a comprehensive *in vivo*  
46 protein interaction screen for the PSP network newly identified in the Gram-positive model  
47 organism *Bacillus subtilis* and found a strong interconnected PSP response system, illustrating  
48 the validity of our approach. Our study highlights the diversity of PSP organization and function  
49 across many bacterial and archaeal phyla and will serve as foundation for future studies of this  
50 envelope stress response beyond model organisms.

51

## 52 **Introduction**

53 The cell envelope is an essential, multilayered and complex structure, which physically  
54 separates bacterial cells from the environment. In their structural composition, Gram-positive  
55 and Gram-negative bacteria both share the cytoplasmic membrane and the cell wall. While the

56 latter is much thicker in Gram-positive bacteria, the Gram-negative envelope additionally  
57 harbors an outer membrane (Silhavy et al. 2010). The cytoplasmic membrane is the functional  
58 barrier of the cell and fulfills crucial tasks, such as serving as a diffusion barrier, allowing the  
59 generation of the proton motive force and providing a platform for protein-protein interaction  
60 (Silhavy et al. 2010; Hurdle et al. 2011). Due to its essentiality, it is indispensable for  
61 prokaryotes to closely monitor and maintain their cell envelope integrity (Strahl and Errington  
62 2017). This involves stimulus perception and signal transduction modules that comprise  
63 complex regulatory networks orchestrating a cell envelope stress response (CESR), which is  
64 activated when a cell is challenged with adverse conditions, such as envelope-perturbing  
65 antimicrobial compounds (Ulrich et al. 2005; Jordan et al. 2008).

66 One such system, the phage-shock-protein (PSP) response, has been studied in bacteria and  
67 one component of this system, PspA, has been identified in archaea and plants (Vothknecht  
68 et al. 2012). Initial studies in *Escherichia coli* revealed a strong induction of the PspA protein  
69 expression during phage infection accompanied by the production of the phage protein pIV,  
70 reassembling an outer-membrane pore forming secretin (Brissette et al. 1990). Subsequent  
71 studies on the PSP network identified various inducers including other secretins, elevated  
72 temperature or osmolarity, or interference with fatty acid biosynthesis (Bergler et al. 1994;  
73 Hardie et al. 1996; Kobayashi et al. 1998). In *E. coli*, PspA is encoded in the *pspABCDE* operon  
74 and expression levels are regulated by the PspF enhancer-binding protein via  $\sigma^{54}$  (Figure 1)  
75 (Brissette et al. 1991; Jovanovic et al. 1996). Under non-induced conditions, PspA forms a  
76 complex with PspF, thus silencing its own transcription (Figure 1) (Dworkin et al. 2000).  
77 Dependent on the stimulus perceived, PspB and PspC function as signaling units and initiate  
78 the disassembly of the PspA-PspF complex, thereby enabling activation of the system (Weiner  
79 et al. 1991; Kleerebezem et al. 1996; Flores-Kim and Darwin 2016). As a consequence, PspA  
80 proteins form a 36-meric donut-shaped oligomer that supports membrane integrity at the site  
81 of damage perception (Figure 1) (Engl et al. 2009). Interestingly, activation of the PSP system  
82 in *E. coli* by heat was shown to be PspB and PspC independent and solely required PspA  
83 (Weiner et al. 1991). Thus, PspA functions as i) a regulator, ii) a sensing unit, and iii) an effector

84 protein, substantiating its key role within the PSP network. The biological function and  
85 physiological significance of the remaining PSPs, PspD and PspE, are still unclear (Adams et  
86 al. 2002; Flores-Kim and Darwin 2016). PspF also regulates the orphan *pspG* gene, which is  
87 the only other known PspF-target in *E. coli*. However, the role of PspG in the PSP response is  
88 not fully understood (Green and Darwin 2004; Flores-Kim and Darwin 2016). Deletions in the  
89 *psp* operon of *E. coli* show mild phenotypes, such as growth defects in late stationary phase  
90 (Weiner and Model 1994; Flores-Kim and Darwin 2016).

91 In contrast, the PSP system in *Yersinia enterocolitica* is of importance for bacterial survival  
92 when the virulent Ysc type III secretion system is expressed during host infection (Darwin and  
93 Miller 2001). It has been shown that the deletion of *pspC* results in reduced virulence and  
94 growth defect (Darwin and Miller 1999; Darwin and Miller 2001). Detailed research on the PSP  
95 response also revealed the roles of the membrane proteins PspB and PspC as dually (positive  
96 and negative) acting regulators in *psp* operon expression in *Y. enterocolitica* (Yamaguchi and  
97 Darwin 2012). Surprisingly, PspA plays no essential role in terms of cell growth and bacterial  
98 survival during host infection, whereas PspBC are needed to protect the cells from secretin-  
99 induced death (Maxson and Darwin 2006; Gueguen et al. 2009). Furthermore, the genetic  
100 organization of the PSP locus in *Y. enterocolitica* differs from that in *E. coli*, e.g. PspC contains  
101 an N-terminal extension that is involved in *psp* gene expression regulation and is not present  
102 in *E. coli* and a PspE homolog is missing in *Y. enterocolitica* (Darwin and Miller 2001; Flores-  
103 Kim and Darwin 2016).

104 In the Gram-positive model organism *Bacillus subtilis*, the PspA homolog termed LiaH also  
105 forms oligomeric ring structures as a consequence of cell envelope stress (CES), thus  
106 substantiating the role of PspA-like proteins in supporting membrane integrity (Wolf et al. 2010;  
107 Wolf et al. 2012). In contrast to the regulation in *E. coli*, *B. subtilis* *liaH* is controlled by the two-  
108 component system (TCS) LiaRS, which strongly induces expression of the *liaH* operon upon  
109 perceiving CES. In addition to LiaH, this operon encodes a membrane anchor protein LiaI,  
110 which facilitates LiaH recruitment to the cytoplasmic membrane (Jordan et al. 2008; Wolf et al.  
111 2010). *B. subtilis* also encodes a second PspA-like protein and a PspC domain-containing

112 protein in separate operons. Potential diversity of the Psp system is further supported by a  
113 recent study of the actinobacterium *Corynebacterium glutamicum*, where the PspC domain  
114 was found as the N-terminal input module of a histidine kinase, embedded in a three-  
115 component system responsive to CES (Kleine et al. 2017).

116 Previous genomics studies focused on analyzing the PSP system only in three bacterial phyla  
117 - Proteobacteria, Firmicutes, and Actinobacteria, with experimentally studied representatives  
118 (Huvet et al. 2011; Ravi et al. 2018), whereas the newest genome-based taxonomy defines  
119 more than 100 bacterial and archaeal phyla (Parks et al. 2018). Thus, our knowledge on  
120 diversity and distribution of the PSP system throughout prokaryotes is very limited. To fill this  
121 gap, we performed a large-scale genomic analysis of PSP networks in bacteria and archaea  
122 by analyzing over 22,000 genomes, representing all bacterial and archaeal phyla for which  
123 sufficient genomic data is available (Parks et al. 2018). First, we analyzed the distribution of  
124 PSP-specific domains throughout different phylogenetic ranks. We then performed an in-depth  
125 profiling of putative PSP networks encoded in each genome in the dataset. The PspA and  
126 PspC domains showed the highest diversity with respect to phyletic distribution and  
127 associations with other domains within a single protein. By analyzing the domain architectures  
128 and genetic neighborhoods of PspA and PspC, we identified new genomic organizations and  
129 provided context-specific knowledge enabling predictions of novel PSP network architectures  
130 and domain combinations. Using a broad bacterial two-hybrid screen we confirmed the results  
131 of our *in silico* analysis by experimentally dissecting the PSP network of *B. subtilis*, which  
132 consists of 14 known and predicted PSP proteins encoded in three separate genomic  
133 locations.

134

## 135 **Results and Discussion**

### 136 **Genomic perspective on the phage shock proteins**

137 The genomic sequence space of the microbial world is rapidly increasing with close to 150,000  
138 bacterial and more than 2,000 archaeal genomes currently classified in the Genomic  
139 Taxonomy database (GTDB v86) (Parks et al. 2018). But the sheer size of this dataset does

140 not necessarily reflect the phylogenetic diversity in nature, as the number of sequenced  
141 bacterial genomes is currently heavily biased towards three bacterial phyla: Proteobacteria,  
142 Firmicutes and Actinobacteriota, comprising more than two-thirds of the available genomic  
143 data (Parks et al. 2018). This leaves the remaining bacterial phyla highly underrepresented  
144 and demands an unbiased approach to tackle genomic data. We therefore first generated such  
145 dataset, containing approximately 22,000 genomes that represent 99 bacterial and 10 archaeal  
146 phyla (Figure 2A, and Material and Methods). This set of genomes is a balanced dataset  
147 compiled and used for classification by the GTDB (Parks et al. 2018). Next, we applied Hidden-  
148 Markov-Models (HMMs) of each phage shock protein (PSP) domain present in *E. coli* on all  
149 genomes to screen our dataset for the diversity of the PSP systems throughout bacteria and  
150 archaea. Then we analyzed the phylogenetic distribution of each domain from the known  
151 proteobacterial PSP network (Figure 2A). 83 bacterial and 7 archaeal phyla contain genomes  
152 encoding PSPs, but the abundance of PSP-positive genomes within these phyla varied  
153 substantially (Figure 2A, black/white circles). About 45% and 60% of the phyla contained  
154 genomes encoding the effector protein PspA and the signaling protein PspC, respectively.  
155 Their wide phylogenetic distribution was the first indication that the PspA and PspC domains  
156 represent the core of the PSP network architecture (Figure 1A). This was supported by the  
157 rapid descending number of phyla encoding other members of the PSP system, such as the  
158 signaling protein PspB, which was found only in 26% of the analyzed phyla.  
159 The transcriptional activator PspF is a special case: while it was present in 50% of the phyla,  
160 its domain composition is not restricted to the PSP response but is instead associated with a  
161 variety of additional cellular processes (Neuwald et al. 1999). Since the PspF regulator of the  
162 PSP response has so far only been described in Enterobacteriaceae, the occurrence of  
163 orthologous proteins outside this phylogenetic group is most likely not specifically associated  
164 with the PSP response (Elderkin et al. 2002; Flores-Kim and Darwin 2016). The same accounts  
165 for the single domain protein PspE, a rhodanese that catalyzes sulfur transfer from thiosulfate  
166 to thiophilic acceptors in a variety of cellular processes beyond the involvement in PSP  
167 networks (Cheng et al. 2008; Hatahet et al. 2014). PspD and PspG, the two remaining PSP

168 members present in the classical system of *E. coli* have the narrowest phylogenetic  
169 distribution. PspG was only found in four genomes from three phyla outside of Proteobacteria,  
170 while PspD was restricted to Proteobacteria. Since only proteobacterial genomes harbor all  
171 PSP proteins, we next focused on the PSP distribution within this phylum. First, a  
172 representative collection of 7,500 proteobacterial genomes was resolved on the taxonomic  
173 level of the order (Figure 2B, Material and Methods). Here, the complete set of PSP members  
174 was only found within Enterobacterales, whereas the remaining orders showed only partial  
175 representation of the PSP system (Figure 2B). Within the order Enterobacterales, we next  
176 resolved the PSP domain distribution at the taxonomic rank of families (Figure 2C).  
177 Remarkably, the complete PSP system, as found in *E. coli*, was only present in the closest  
178 relative species, such as *Salmonella enterica*. More distantly related species of the same  
179 family, such as *Photobacterium luminescens*, harbors PSP associated proteins with only the  
180 core functions, comprised of PspABC. This observation already hints at the existence of  
181 alternative compositions of the PSP response system even in bacteria closely related to *E. coli*  
182 (Figure 2C) (Flores-Kim and Darwin 2016).

183

#### 184 **PspA and PspC domains are the most prevalent PSP network members**

185 The indicated diversity of the PSP response prompted us to next identify the PSP profiles of  
186 each genome within the dataset to establish a comprehensive overview of co-occurring PSP  
187 patterns and to resolve the conservation of PSP network organization in bacteria and archaea.  
188 Towards this goal, we analyzed the co-occurrence of PSP members in each genome. We first  
189 screened the dataset for the presence or absence of individual PSPs. 68% of the approx.  
190 22,000 genomes encoded at least one PSP domain-containing protein, while close to 7,200  
191 genomes lacked any PSP representative (Figure 3A and Table S1). More than 60% of the  
192 40,000 PSP proteins identified contained either PspA or PspC domains (Figure 3A), including  
193 genomes containing multiple copies of the same PSP domain. For example, we identified eight  
194 PspA proteins in the genome of *Aneurinibacillus tyrosinisolvens*, which was recently isolated  
195 from methane-rich seafloor sediments (Tsubouchi et al. 2015) (Table S1).

196 We next categorized the PSP domain distribution and abundance by assigning a PSP profile  
197 to each genome. From approximately 15,000 genomes encoding PSP proteins, more than  
198 45% only harbored PspA-, PspC- or PspA- and PspC-domain proteins (Figure 3B and Table  
199 S4). In comparison, only about 1% (79 genomes from Enterobacteriaceae) encoded the full  
200 repertoire of the PSP network (Figure 3B). These observations strongly support the hypothesis  
201 that most PSP networks deviate in their architecture from the proteobacterial blueprint  
202 exemplified by *E. coli* or *S. enterica*. More than 10% of the genomes containing only PspA or  
203 PspC encoded their multiple paralogs (Figure 3C and Table S5). These duplications were  
204 found in 16 phyla for PspA and 23 for PspC. In genomes harboring both PspA and PspC, many  
205 encoded multiple PspC domains. This may suggest that either the signaling properties of PspC  
206 domains serve beyond their relationship linked to PspA or that different stimuli are integrated  
207 via individual PspC proteins to enhance PSP response specificity (Figure 3C).

208

### 209 **Domain combinatorics and diversity of PspA and PspC**

210 We next focused our attention on the predominant PspA- and PspC domains and domain  
211 architectures of the cognate proteins, in order to identify domain combinations that have been  
212 established and conserved in the course of evolving PSP-like responses. Such conserved  
213 domain combinations might *e.g.* provide important mechanistic insights on the regulation of  
214 PSP responses that differ from the proteobacterial model. For example in *C. glutamicum*, PspC  
215 domain is part of a histidine kinase, indicating that PspC-dependent sensing is transduced by  
216 a two-component system in order to orchestrate a PSP-like envelope stress response in this  
217 actinobacterium (Kleine et al. 2017). Towards this end, we calculated sequence lengths of  
218 PspA and PspC domain-containing proteins. Since protein domains are on average 100 AAs  
219 long, typically ranging from 50 to 200, we expected that shuffling of domain architectures within  
220 one protein would result in a notable extension of protein length (Xu and Nussinov 1998;  
221 Wheelan et al. 2000). For the PspA domain-based search, we used the Pfam PspA\_IM30  
222 HMM model of 221 AAs length (El-Gebali et al. 2019) (Material and Methods). Analysis of the  
223 length distribution of all PspA-like proteins revealed that the majority of proteins are approx.



224 200-250 AAs long, indicating no significant sequence space for additional domains (Figure 4A  
225 and Table S6). One notable exception was the wider size distribution of PspA homologs in the  
226 Actinobacteriota: in this phylum, numerous PspA-containing proteins were approx. 300 AA in  
227 length. However, a subsequent analysis of these proteins, using the HMMscan module, failed  
228 to identify any additional PspA-associated domains (see Table S14). In contrast, the analysis  
229 of PspC-containing proteins identified diverse domain architectures. The majority of proteins  
230 are far longer than the ~50 AAs typical of the stand-alone PspC domain (Figure 4B) (El-Gebali  
231 et al. 2019). In the Actinobacteriota, the size range of PspC-containing proteins was between  
232 50 and 1000 AAs (Figure 4B). A detailed analysis of all protein sequences longer than 300  
233 AAs revealed that in more than 50% of them the PspC domain was accompanied by a histidine  
234 kinase domain (see Table S7 for details), substantiating the diverse role of PspC in signal  
235 transduction processes within this phylum (Kleine et al. 2017; Ravi et al. 2018). Conserved  
236 combinations of PspC with other domains were not restricted to Actinobacteriota. In Firmicutes  
237 and Spirochaetota, we observed PspC domains arranged with several domains of unknown  
238 function (DUFs). Notably, in Firmicutes we identified proteins combining PspC and PspA  
239 domains, which demonstrates the existence of alternative PSP architectures compared to  
240 those found in *E. coli*, in which the domains are encoded by separate genes (Figure 4B and  
241 Table S7). Additionally, we identified phylum-specific (Bacteriodota and Firmicutes) C-terminal  
242 conserved regions in PcpC that did not match any protein domain model from public databases  
243 (Figure 4C and Table S8). A previous report demonstrated that the C-terminal region of PspC  
244 is of particular importance in secretin-dependent induction of a PSP response in *Y.*  
245 *enterocolitica* (Gueguen et al. 2009). Thus, we hypothesize that this conserved region found  
246 in representatives of Bacteriodota and Firmicutes might also perform signaling functions in  
247 their respective PSP networks. To obtain a complete picture of PSP network architectures, we  
248 next expanded our analysis to the conservation of the genomic neighborhood of PspA- and  
249 PspC-encoding genes.

250

251 **Genomic context conservation of PspA and PspC-encoding genes**

252 In prokaryotes, genes are often organized in operons, that encode physically interacting  
253 proteins (Koonin and Mushegian 1996; Dandekar et al. 1998; Wells et al. 2016; Esch and Merkl  
254 2020) or proteins from the same functional pathway (Rogozin, Makarova et al. 2002, Zaslaver,  
255 Mayo et al. 2006). The systematic association between functionally related genes in operons  
256 is frequently used to characterize genes with unknown function (Overbeek et al. 1999; Wolf et  
257 al. 2001; Moreno-Hagelsieb and Janga 2008). The intergenic distance and orientation of  
258 individual genes is usually a reliable measure to predict operon arrangements (Salgado et al.  
259 2000). It is well established that intergenic regions between identically oriented genes with less  
260 than 100-200 bp gaps enable accurate prediction of operon structures (Moreno-Hagelsieb and  
261 Collado-Vides 2002; Strong et al. 2003; Chen and Dubnau 2004; Edwards et al. 2005).

262 For our analyses of PspA- and PspC-encoding gene neighborhoods, an operon was defined  
263 as genes of the same orientation that are closer than 150 bp to each other (see Materials and  
264 Methods). We generated gene neighborhood profiles for phyla containing more than ten PspA  
265 or PspC proteins respectively (Figure 5A, B; for full datasets see Tables S9 and S10).  
266 Subsequently, protein sequences of the potentially co-expressed genes were retrieved, and  
267 protein domains were identified using HMMscan (see Materials and Methods). We then  
268 created consensus gene neighborhoods based on the abundance of protein domains within  
269 each phylum (Figure 5A, B and Tables S9 and S10). As expected for Proteobacteria, PspA  
270 was predominantly accompanied by PspB, PspC and PspD, reflecting the well-studied *psp*  
271 operon of *E. coli*. PspE was missing from the consensus gene neighborhood, despite its high  
272 abundance within some orders of the Proteobacteria (Figure 2B). Our analysis also reinforced  
273 previous observations that the PSP operon is often encoded with *ycjX*-like genes, containing  
274 the DUF463 domain within the phylum of Proteobacteria (Huvet et al. 2011). DUF463 belongs  
275 to the Pfam superfamily “P-loop\_NTPase (CL0023)”, which contains many proteins that are  
276 involved in assembly and function of protein complexes (Neuwald et al. 1999). However, a  
277 physiological link of the PSP response with these proteins is still unknown. Moreover, DUF463-  
278 containing proteins are not mandatorily associated with the PSP response, as this domain is  
279 also found in 14% of all PSP null genomes (7171, Figure 3A), most of which belong to the

280 phylum of Proteobacteria (see also Table S15). Beyond the Proteobacteria, the core PspABC  
281 protein set was only conserved within the phylum Desulfobacterota. In most phyla PspA is  
282 encoded without any other classical PSP protein in its neighborhood, with the exception of  
283 PspC. In a notable number of phyla, such as Acidobacteriota, Bacteriodota, Firmicutes and  
284 Fusobacteriota, proteins containing the Band 7 domain were found encoded next to *pspA*  
285 genes. The presence of *pspA* genes in actinobacterial operons encoding histidine kinases  
286 suggests alternative ways of regulating PspA-mediated (envelope) stress responses. Our  
287 analysis demonstrated an overall tendency for *pspA* genes to be co-located with genes  
288 encoding DNA binding proteins or other regulatory domain-containing proteins, e.g. in the  
289 phyla Acidobacteriota, Firmicutes or Spirochaetota (Figure 5A). Previously, this was observed  
290 just in a few model organisms, e.g. *pspA* is encoded adjacent to *pspF* in *E. coli* and *Y.*  
291 *enterocolitica* (Huvet et al. 2011). In Cyanobacteriota, more than half of the PspA proteins  
292 are encoded as mono-cistronic transcriptional units.

293 For PspC, the gene neighborhood analysis revealed a clear preference for genes encoding  
294 predicted membrane-associated proteins (Figure 5B). In the majority of analyzed phyla, PspC  
295 was encoded together with PspA and DUF proteins as well as ABC transporters and other  
296 membrane proteins. In contrast to PspA, which is preferentially encoded in operons, PspC  
297 genes regularly locate outside of an operon structure (Figure 5B black/white bars). In phyla  
298 encoding PspC in absence of PspA, PspC-containing proteins are predominately  
299 accompanied by genes encoding transporters or DNA binding proteins. Especially in  
300 Actinobacteriota and Halobacterota, PspC appears to be primarily involved in cellular signaling  
301 without PspA contribution. This is in line with the observed presence of PspC domain as a  
302 sensory unit of histidine kinases and as part of signal transduction pathways, as discussed  
303 above (Figure 4B).

304

### 305 **PSP interaction network in *Bacillus subtilis***

306 Our analysis of a phylogenetically diverse genomic dataset revealed that PspA and PspC are  
307 the most widely distributed components of PSP response system which indicates their ancient

308 origin. Our study demonstrated that there is no “typical” PSP network architecture: the  
309 paradigmatic PSP responses as described in *E.coli* and *Y. enterocolitica* represent just one  
310 type of the PSP system and a plethora of alternative PSP network architectures exists in the  
311 microbial world. As a first proof-of-principle, we analyzed the PSP network of the Gram-positive  
312 model organism *B. subtilis*. The genome of *B. subtilis* encodes two PspA homologs (PspA and  
313 LiaH) and one PspC homolog (YvIC), which are spread across three operons. We  
314 hypothesized that most of the additional 11 genes in these operons encode proteins that  
315 partake in the PSP-dependent CESR network (Figure 6). A tight physiological and regulatory  
316 link between the proteins encoded in the *liaIH-liaGFSR* locus has been documented (Jordan  
317 et al. 2006; Wolf et al. 2010; Dominguez-Escobar et al. 2014). While the regulatory role of the  
318 LiaFSR ‘three’-component system in orchestrating expression of the *liaIH* operon as the main  
319 effector of the Lia response is firmly established, no function could so far be attributed to LiaG.  
320 This membrane anchored protein contains a DUF4097 domain, which can also be found in  
321 another hypothetical protein, YvIB, which is encoded in the *yvIABCD* operon. Remarkably, this  
322 domain has been found in the genomic neighborhood of PspC-encoding proteins in other  
323 Firmicutes. The remaining three genes in this operon encode putative membrane proteins. The  
324 second PspA homolog, namely PspA, is encoded in the *pspA-ydjGHI* operon, where three  
325 genes encode additional membrane proteins and a cytoplasmic protein. One of the  
326 transmembrane proteins, YdjG contains a zinc ribbon domain (Pfam: TF\_Zn\_Ribbon) that is  
327 known to bind DNA and therefore to be involved in regulatory processes within the cell. The  
328 cytoplasmic protein YdjI belongs to the Band 7 protein family.

329 For a complete picture of protein interaction network within PSP system of *B. subtilis*, we  
330 performed a bacterial-two-hybrid (B2H) screen with all proteins from three operons encoding  
331 PSP domain-containing proteins (Figures S1 and S2). The B2H is a powerful and sensitive  
332 tool for detecting not only stable interacting proteins but also weak and transient protein  
333 interactions (Stasi et al. 2015; Lin and Lai 2017). The B2H showed strong protein-protein  
334 interaction not only between proteins encoded in the same operon but also with proteins  
335 encoded in other operons (Figure 6). Membrane anchor protein LiaI strongly interacted with

336 the PspA homolog LiaH, which substantiates a previous study demonstrating that LiaI serves  
337 as the membrane anchor for LiaH upon cell envelope damage (Wolf et al. 2010; Domínguez-  
338 Escobar et al. 2014). Moreover, we observed strong LiaI and LiaG interaction and a weak  
339 interaction of LiaG with LiaH. To date, the role of LiaG within the Lia CESR remains elusive,  
340 since a LiaG deletion has no observable phenotype (Jordan et al. 2006). Our data indicates  
341 that LiaG might promote recruitment of LiaH to the membrane either by binding the protein  
342 directly and/or supporting the LiaI-LiaH complex (Figure 6C). Furthermore, LiaG contains an  
343 extracellular DUF4097 domain containing a  $\beta$ -propeller motif. Beta-propeller motifs are  
344 assumed to be involved in signal transduction and protein-protein interactions (Fülöp and  
345 Jones 1999). The same domain occurs within the YvIB protein (Figure 6C). Notably, YvIB  
346 strongly interacts with PspA and LiaH as well as with other proteins encoded in the *yvI* operon  
347 (Figures 6B and 6C; Figures S1 and S2). YvIB appears to play a key role in connecting the  
348 PspA-homolog encoding operons together with the *yvI*-operon containing the PspC-homolog  
349 YvIC (Figure 6C). Regarding the protein-protein interaction between PspA and the Ydj  
350 proteins, PspA is potentially recruited to the cell membrane and seems to interact with YdjG  
351 or YdjH via the adapter protein YdjI that contains a Band 7 domain and belongs to the flotilin  
352 protein family. Flotilins are described to be involved in the organization of membrane micro  
353 domains or so called lipid rafts (Lopez and Koch 2017). In summary, our computational  
354 approach led to the identification a PSP network spanning across three different loci in  
355 *B.subtilis*.

356

### 357 **PSP systems in archaea**

358 To date, PSP networks in archaea are largely unknown. We analyzed 915 archaeal genomes  
359 representing ten phyla (Table S1). Similar to bacteria, PspA and PspC proteins were both most  
360 prevalent and taxonomically widely distributed, with 25% and 12% of the analyzed genomes  
361 contained solely either protein, respectively. In contrast, more than 50% of all genomes lacked  
362 any of the PSP proteins, arguing for an overall rather low distribution of PSP members across  
363 archaea (Table S11). One archaeal genome, *Methanoperedens sp. BLZ2* classified as

364 Halobacterota, encoded genes for two PspAs, one PspB, and one PspC protein. Strikingly, all  
365 these proteins are encoded in separate operons. PspA proteins are located next to genes  
366 encoding a small multi-drug exporter or an extracellular peptidase. PspB and PspC are parts  
367 of operons that also contain genes encoding for multiple DNA-binding HTH domains and  
368 combined PAS domain-containing or response regulator proteins indicating their involvement  
369 in signal transduction. Proteomic analysis of *Haloferax volcanii* revealed upregulation of a  
370 PspA homolog upon salinity stress (Bidle et al. 2008). This observation indicates a functional  
371 overlap between PSP responses in archaea and bacteria. Applying our thresholds for an  
372 operon structure (see Materials and Methods), we identified the fourth transmembrane protein  
373 encoded downstream of *pspA* (locus tag: Hvo2637). Subsequent analysis identified two  
374 domains in this protein, bPH\_4 and EphA2\_TM, with probabilities of 60% and 80%,  
375 respectively (Adebali et al. 2015). EphA2\_TM has been associated with tyrosine kinase  
376 acceptors (Bocharov et al. 2010), which suggests that the protein might potentially play a  
377 signaling role within the PSP response of *H. volcanii*. PSP members seem poorly conserved  
378 within archaeal representatives. Most genomes do not encode PSP associated genes,  
379 whereas the majority of those that encode are limited to PspA or PspC.

380

### 381 **Concluding Remarks**

382 Previous studies on the diversity of the PSP system were limited to 3 bacterial phyla (Huvet et  
383 al. 2011; Manganelli and Gennaro 2017; Ravi et al. 2018). We substantially expanded previous  
384 analyses by carrying out an unbiased comparative genomic analysis of PSP response  
385 networks across more than 100 phyla of bacteria and archaea. We performed PSP domain  
386 model-based searches and revealed a variety of PSP architectures and a heterogeneous  
387 distribution of PSP proteins across taxonomic groups. We demonstrated that PspA and PspC  
388 are both the most frequently found and phylogenetically most widely distributed components  
389 of the PSP response network (Figure 2A). Our analysis revealed diverse protein networks of  
390 PSP responses across bacteria and archaea. The PSP system displays remarkable diversity  
391 with respect to component design, phylum-specific conserved architectures, and postulated

392 modes of both signal transduction and underlying physiologies. We fully reconstructed *in silico*  
393 PSP networks in two phyla that contain large number of sequenced genomes –  
394 Acidobacteriota and Bacteroidota. For example, in Acidobacteriota, we found PspA associated  
395 with Band 7 and FloT domain containing proteins responsible for stabilizing membrane integrity  
396 upon changes of its fluidity state under stress conditions (Bach and Bramkamp 2013). The  
397 NfeD protein, which has been identified as partner-protein in gene neighborhood analyses,  
398 may support PspA assembly and/or function (Green et al. 2009). We also identified the HTH  
399 domain containing transcriptional regulators encoded in the PspA operons that potentially can  
400 regulate the operon expression. Our analysis suggests that PspC in Bacteroidota might be  
401 directly involved in the beta-lactam stress response (Figure 7).

402 We demonstrated the utility of our computational analysis by showing that proteins predicted  
403 to comprise the PSP system in *B. subtilis* physically interact, although they are encoded in  
404 three different operons (Figure 6 and Figures S1 and S2). It is well known that the Lia system  
405 containing the PspA homolog LiaH serves as a resistance determinant under CES conditions  
406 (Mascher et al. 2003; Mascher et al. 2004; Radeck et al. 2016). Interaction of LiaH with the  
407 YvIB protein revealed in this study suggests a potential additional role for LiaH within the PSP  
408 network.

409 In summary, our comprehensive and unbiased analysis of bacterial and archaeal genomes  
410 revealed an unexpected diversity of the PSP system that can now be tested experimentally.

411

## 412 **Materials and Methods**

### 413 **Bioinformatics tools and software environments**

414 The following software packages were applied in this study: HMMER v3.2.1 (Eddy 2011),  
415 MAFFT 7 online version (Kato et al. 2017), MEGA-X (Kumar et al. 2018), CDvist (Adebali et  
416 al. 2015), Jalview (Waterhouse et al. 2009), iTOL (Letunic and Bork 2019) and CD-HIT (Huang  
417 et al. 2010). Multiple-sequence alignments were generated using the default set L-IN-I  
418 algorithm from MAFFT (Kato et al. 2017). The neighbor-joining tree (Figure 2B; Supplement  
419 table 2) was built in MEGA-X with pairwise deletion using the poisson model. All maximum

420 likelihood trees were computed in MEGA-X with applying the Jones-Taylor-Thornton (JTT)  
421 substitution model and using all sites, unless otherwise specified. Final visualization and  
422 mapping of PSP domains onto the phylogenetic trees was performed using iTOL.  
423 Computational analyses were executed on a local computing environment and custom scripts  
424 for data processing, filtering and evaluation were written in Python v2.7 or v3.7 in the  
425 environment of PyCharm v2019.1.1.

426

#### 427 **Data sources**

428 Bacterial and archaeal genomes were analyzed that are declared as representatives according  
429 to the Genome Taxonomy Database (GTDB) r86 (Parks et al. 2018). In total, 22,254  
430 proteomes were obtained that were available at the National Center for Biotechnology  
431 Information (NCBI) Reference Sequence (RefSeq) or GenBank databases as of October 2018  
432 (Supplement table 1). All performed analyses were done using this final dataset or derived  
433 subsets as indicated. Analysis of PSP domains in the obtained genomes was performed using  
434 HMMer (<http://hmmer.org/>). To run the HMMsearch module, hidden-markov-models (HMM)  
435 were obtained from the Protein Families database (Pfam): PF04012.12, PF06667.12,  
436 PF04024.12, PF09584.10 and PF09583.10 (El-Gebali et al. 2019). Models for the two  
437 remaining PSP related proteins, PspE and PspF, for which no model was available at Pfam,  
438 were generated by downloading their TIGRFAMs, TIGR02981 and TIGR02974 respectively  
439 (Haft et al. 2001). The seed sequences were obtained and used to build HMM models locally  
440 using the HMMbuild module.

441

#### 442 **Identification of PSPs in the genomic datasets**

443 All seven, PspA to PspG, HMM models were probed against each genome downloaded  
444 applying the HMM- search module. Obtained results were checked for their accuracy and to  
445 avoid false positive hits via a python script that filtered following criteria: i) the e-value threshold  
446 cutoff for a positive hit was set to  $10^{-3}$ , ii) the domain had to start within the first 50 AA of the  
447 protein and iii) the alignment of the HMM model with the protein sequence had to exceed 90%



448 of the models length. In total 39,950 proteins fulfilled these criteria and were considered as  
449 PSPs (Supplement Table 1).

450

### 451 **Construction of phylogenetic trees**

452 The sets of concatenated and aligned 120 proteins (bacterial) and 122 (archaeal), proposed  
453 by the GTDB criteria, were used to build phylogenetic trees in Figure 2 (Parks et al. 2018).  
454 Figure 2A was adapted and modified from the pre-computed phylogenetic tree presented by  
455 AnnoTree (Mendler et al. 2019) and only serves as representation of the phylogenetic  
456 distribution of PSPs. For the dataset in Figure 2B, a maximum of 55 members of each of the  
457 53 orders within the class of Gammaproteobacteria were randomly chosen resulting in 742  
458 genomes (Supplement table 2). The amount of 55 genomes was set according to a hyper  
459 geometric distribution setting a 95% probability threshold to at least include one genome within  
460 the Enterobacterales order having the full set of PSPs. From orders with less than 55 members  
461 all genomes were included and a neighbor-joining tree was computed. The dataset in Figure  
462 2C, is based on the species (41 genomes) used in (Ortega and Zhulin 2016), representing the  
463 diversity of the Enterobacteriaceae family (Supplement table 3). Four species had to be  
464 replaced by genomes declared as representatives according to the GTDB. A maximum  
465 likelihood tree using the JTT model with 100 bootstraps was applied to the respective set of  
466 120 concatenated aligned proteins provided by the GTDB.

467

### 468 **Protein domain co-occurrence analysis**

469 To characterize potential co-occurring protein domains associated within PspA or PspC  
470 domain-containing proteins, respective proteins were downloaded at the NCBI protein  
471 database (Supplement Table 6 and 7). The HMMscan module was used with an e-value  
472 threshold of 0.001 to search for associated domains in PspA and PspC domain-containing  
473 proteins. Identified domains were obtained from the Pfam HMM (march 2019) library for PFam-  
474 A families. For better overview, only phyla containing more than ten PSPs were included into  
475 the Figures 3A and B respectively. For full dataset see Supplement Table 6 and 7.

476  
477  
478  
479  
480  
481  
482  
483  
484  
485  
486  
487  
488  
489  
490  
491  
492  
493  
494  
495  
496  
497  
498  
499  
500  
501  
502  
503

### **Creation of Weblogs for PspC domain-containing proteins**

To identify PspC C-terminal conserved regions, respective proteins were further analyzed by generating a multiple sequence alignment (MSA) in MAFFT (Kato et al. 2017) and Jalview for visualization (Waterhouse et al. 2009) (Figure 4C). The weblogo of the final MSA was created using the online version of Weblogo (Crooks et al. 2004). Secondary structure predictions were performed in Phyre2 (Kelley et al. 2015). For used proteins, see Supplement Table 8 and the MSA provided in Supplement File S1.

### **Gene neighborhood analysis**

Analysis of gene neighborhood was performed using the application programming interface (API) implemented in the Microbial Signal Transduction database (MiST3) (Gumerov et al. 2020). For each query gene, five up- and downstream genes were obtained and filtered for orientation and their respective location. An operon structure was defined for genes that shared the same strand orientation and were located no more than 150 base pairs apart from each other. Proteins that were identified as gene neighborhood were then obtained from the Refseq NCBI database. The HMMscan module was then used to identify protein domains, using an e-value threshold of 0.001. To exclude overlapping domain hits, e.g. Band\_7 and Band\_7\_1, which would cover the same sequence space, only first domain hits were considered. For proteins, containing multiple non-overlapping domains, their domain architecture was fused e.g. HisKA\_3 and HATPase\_c and finally categorized (Supplement Tables 9 and 10). For better overview and to generate the consensus gene neighborhood, two thresholds were applied: i) only phyla containing at least ten PSP positive genomes were included and ii) the identified protein domain had to be present in more than 10% of the genomes within the analyzed phyla e.g. from the 19 PspAs analyzed in Acidobacteriota, 11 contained a Band 7\_Flot protein in their gene neighborhood, thus resulting in 58%. For complete dataset see Supplement Tables 9 and 10.

## 504 **DNA manipulation**

505 Plasmids were constructed using standard cloning techniques as described elsewhere  
506 (Sambrook and Russell 2001). For DNA amplification via PCR, Q5 polymerase was used.  
507 Enzymes were purchased from New England Biolabs (NEB, Ipswich, MA, USA) and applied  
508 following their respective protocols. Positive *E. coli* clones were checked by colony PCR, using  
509 OneTaq polymerase. All constructs were verified by sequencing. All strains, primers and  
510 plasmids used in this chapter are listed in Supplement Table 13.

511

## 512 **Bacterial-two-hybrid assay**

513 The bacterial-two-hybrid experiment is based on an adenylate cyclase reconstruction resulting  
514 in the transcription of the reporter gene *lacZ* in *E. coli* (Karimova et al. 1998). The gene is  
515 encoding for a  $\beta$ -galactosidase. The enzyme is able to cleave X-Gal that results in blue colored  
516 colonies. For the bacterial-two-hybrid-assay, the adenylate cyclase is divided into two parts,  
517 each of them either N- or C-terminal present on the vectors pUT18/pUT18C or pKT25/pKT25N.  
518 Genes of interest, encoding candidates for protein-protein interaction, were cloned into these  
519 vectors and a co-transformed into *E. coli* BTH101. Because the interaction of the proteins can  
520 be influenced by the position of the adenylate cyclase, all plasmid combinations were used.  
521 The vectors pUT18 zip and pKT25N zip were included and served as a positive control and  
522 the empty vectors pUT18 and pKT25 were used as a negative control. After the transformation,  
523 the cells were pelleted and resuspended in 40  $\mu$ l LB medium. 10  $\mu$ l of each transformation mix  
524 was spotted on agar plates containing Ampicillin (100  $\mu$ g ml<sup>-1</sup>), Kanamycin (50  $\mu$ g ml<sup>-1</sup>), IPTG  
525 (0.5 mM) and X-Gal (40  $\mu$ g ml<sup>-1</sup>). After the spots dried, the procedure was repeated. The plates  
526 were incubated at 30°C overnight and the next day the rest of the transformation mix was  
527 spotted two times. In most of the cases not enough colonies grew to cover the whole spot area.  
528 To achieve a higher colony density, overnight cultures of the different strains were prepared  
529 and 2 x 10  $\mu$ l were spotted the following day. The plates were wrapped in aluminum foil to  
530 protect them from incident light exposure and stored in the fridge for several weeks to increase  
531 contrast and intensity of the colony color.

532

### 533 **Data Availability Statement**

534 The data underlying this article are available in the article, in its online supplementary material  
535 and on request to the corresponding authors.

536

### 537 **Author contributions**

538 P.F.P. and T.M. conceptualized the study; P.F.P. performed the bioinformatics research; D.W.  
539 and L.B. performed the bacterial two hybrid assay; P.F.P., V.M.G, E.P.A., L.B., T.M. I.B.Z.,  
540 and D.W. analyzed data; P.F.P., T.M., I.B.Z., and D.W. wrote the paper with contribution from  
541 V.M.G. and E.P.A.

542

### 543 **Acknowledgments**

544 The authors thank Josue Flores-Kim for personal communication on *Y. enterocolitica* PSP  
545 response. We also thank Marc Bramkamp (University of Kiel, Germany) and Robyn Emmins  
546 (University of Newcastle, UK) for plasmids as well as Elisa Granato and Mona Steichele (LMU  
547 Munich, Germany) for technical support.

548

### 549 **Funding**

550 This work was supported by a grant from the Deutsche Forschungsgemeinschaft (MA2837/3  
551 to T.M.) in the framework of the priority program SPP1617 Phenotypic heterogeneity and  
552 sociobiology of bacterial populations and in part, by a NIH grant R35GM131760 (to I.B.Z.).

553

### 554 **References**

555 Adams H, Teertstra W, Koster M, Tommassen J. 2002. PspE (phage-shock protein E) of  
556 *Escherichia coli* is a rhodanese. FEBS Letters 518:173–176.

557 Adebali O, Ortega DR, Zhulin IB. 2015. CDvist: a webserver for identification and  
558 visualization of conserved domains in protein sequences. Bioinformatics 31:1475–1477.

559 Bach JN, Bramkamp M. 2013. Flotillins functionally organize the bacterial membrane. Mol.  
560 Microbiol. 88:1205–1217.

- 561 Bergler H, Abraham D, Aschauer H, Turnowsky F. 1994. Inhibition of lipid biosynthesis  
562 induces the expression of the *pspA* gene. *Microbiology* 140 ( Pt 8):1937–1944.
- 563 Bidle KA, Kirkland PA, Nannen JL, Maupin-Furlow JA. 2008. Proteomic analysis of *Haloferax*  
564 *volcanii* reveals salinity-mediated regulation of the stress response protein PspA.  
565 *Microbiology* 154:1436–1443.
- 566 Bocharov EV, Mayzel ML, Volynsky PE, Mineev KS, Tkach EN, Ermolyuk YS, Schulga AA,  
567 Efremov RG, Arseniev AS. 2010. Left-handed dimer of EphA2 transmembrane domain:  
568 Helix packing diversity among receptor tyrosine kinases. *Biophys. J.* 98:881–889.
- 569 Brissette JL, Russel M, Weiner L, Model P. 1990. Phage shock protein, a stress protein of  
570 *Escherichia coli*. *Proceedings of the National Academy of Sciences* 87:862–866.
- 571 Brissette JL, Weiner L, Ripmaster TL, Model P. 1991. Characterization and sequence of the  
572 *Escherichia coli* stress-induced *psp* operon. *Journal of Molecular Biology* 220:35–48.
- 573 Chen I, Dubnau D. 2004. DNA uptake during bacterial transformation. *Nat. Rev. Microbiol.*  
574 2:241–249.
- 575 Cheng H, Donahue JL, Battle SE, Ray WK, Larson TJ. 2008. Biochemical and Genetic  
576 Characterization of PspE and GlpE, Two Single-domain Sulfurtransferases of  
577 *Escherichia coli*. *Open Microbiol J* 2:18–28.
- 578 Crooks GE, Hon G, Chandonia J-M, Brenner SE. 2004. WebLogo: a sequence logo  
579 generator. *Genome Res.* 14:1188–1190.
- 580 Dandekar T, Snel B, Huynen M, Bork P. 1998. Conservation of gene order: a fingerprint of  
581 proteins that physically interact. *Trends Biochem Sci* 23:324–328.
- 582 Darwin AJ, Miller VL. 1999. Identification of *Yersinia enterocolitica* genes affecting survival in  
583 an animal host using signature-tagged transposon mutagenesis. *Mol. Microbiol.* 32:51–  
584 62.
- 585 Darwin AJ, Miller VL. 2001. The *psp* locus of *Yersinia enterocolitica* is required for virulence  
586 and for growth *in vitro* when the Ysc type III secretion system is produced. *Mol.*  
587 *Microbiol.* 39:429–444.
- 588 Domínguez-Escobar J, Wolf D, Fritz G, Höfler C, Wedlich-Söldner R, Mascher T. 2014.  
589 Subcellular localization, interactions and dynamics of the phage-shock protein-like Lia  
590 response in *Bacillus subtilis*. *Mol. Microbiol.* 92:716–732.
- 591 Dworkin J, Jovanovic G, Model P. 2000. The PspA protein of *Escherichia coli* is a negative  
592 regulator of sigma(54)-dependent transcription. *J. Bacteriol.* 182:311–319.
- 593 Eddy SR. 2011. Accelerated Profile HMM Searches. Pearson WR, editor. *PLoS Comput Biol*  
594 7:e1002195.
- 595 Edwards MT, Rison SCG, Stoker NG, Wernisch L. 2005. A universally applicable method of  
596 operon map prediction on minimally annotated genomes using conserved genomic  
597 context. *Nucleic Acids Res.* 33:3253–3262.
- 598 El-Gebali S, Mistry J, Bateman A, Eddy SR, Luciani A, Potter SC, Qureshi M, Richardson LJ,  
599 Salazar GA, Smart A, et al. 2019. The Pfam protein families database in 2019. *Nucleic*  
600 *Acids Res.* 47:D427–D432.

- 601 Elderkin S, Jones S, Schumacher J, Studholme D, Buck M. 2002. Mechanism of action of the  
602 *Escherichia coli* phage shock protein PspA in repression of the AAA family transcription  
603 factor PspF. *Journal of Molecular Biology* 320:23–37.
- 604 Engl C, Jovanovic G, Lloyd LJ, Murray H, Spitaler M, Ying L, Errington J, Buck M. 2009. *In*  
605 *vivo* localizations of membrane stress controllers PspA and PspG in *Escherichia coli*.  
606 *Mol. Microbiol.* 73:382–396.
- 607 Esch R, Merkl R. 2020. Conserved genomic neighborhood is a strong but no perfect indicator  
608 for a direct interaction of microbial gene products. *BMC Bioinformatics* 21:5–8.
- 609 Flores-Kim J, Darwin AJ. 2016. The Phage Shock Protein Response. *Annu. Rev. Microbiol.*  
610 70:83–101.
- 611 Fülöp V, Jones DT. 1999. Beta propellers: structural rigidity and functional diversity. *Curr.*  
612 *Opin. Struct. Biol.* 9:715–721.
- 613 Green JB, Lower RPJ, Young JPW. 2009. The NfeD protein family and its conserved gene  
614 neighbours throughout prokaryotes: functional implications for stomatin-like proteins. *J.*  
615 *Mol. Evol.* 69:657–667.
- 616 Green RC, Darwin AJ. 2004. PspG, a new member of the *Yersinia enterocolitica* phage  
617 shock protein regulon. *J. Bacteriol.* 186:4910–4920.
- 618 Gueguen E, Savitzky DC, Darwin AJ. 2009. Analysis of the *Yersinia enterocolitica* PspBC  
619 proteins defines functional domains, essential amino acids and new roles within the  
620 phage-shock-protein response. *Mol. Microbiol.* 74:619–633.
- 621 Gumerov VM, Ortega DR, Adebali O, Ulrich LE, Zhulin IB. 2020. MiST 3.0: an updated  
622 microbial signal transduction database with an emphasis on chemosensory systems.  
623 *Nucleic Acids Res.* 48:D459–D464.
- 624 Haft DH, Loftus BJ, Richardson DL, Yang F, Eisen JA, Paulsen IT, White O. 2001.  
625 TIGRFAMs: a protein family resource for the functional identification of proteins. *Nucleic*  
626 *Acids Res.* 29:41–43.
- 627 Hardie KR, Lory S, Pugsley AP. 1996. Insertion of an outer membrane protein in *Escherichia*  
628 *coli* requires a chaperone-like protein. *EMBO J.* 15:978–988.
- 629 Hatahet F, Boyd D, Beckwith J. 2014. Disulfide bond formation in prokaryotes: history,  
630 diversity and design. *Biochim. Biophys. Acta* 1844:1402–1414.
- 631 Huang Y, Niu B, Gao Y, Fu L, Li W. 2010. CD-HIT Suite: a web server for clustering and  
632 comparing biological sequences. *Bioinformatics* 26:680–682.
- 633 Hurdle JG, O'Neill AJ, Chopra I, Lee RE. 2011. Targeting bacterial membrane function: an  
634 underexploited mechanism for treating persistent infections. *Nature Publishing Group*  
635 9:62–75.
- 636 Huvet M, Toni T, Sheng X, Thorne T, Jovanovic G, Engl C, Buck M, Pinney JW, Stumpf  
637 MPH. 2011. The evolution of the phage shock protein response system: interplay  
638 between protein function, genomic organization, and system function. *Mol. Biol. Evol.*  
639 28:1141–1155.
- 640 Jordan S, Hutchings MI, Mascher T. 2008. Cell envelope stress response in Gram-positive  
641 bacteria. *FEMS Microbiol. Rev.* 32:107–146.

- 642 Jordan S, Junker A, Helmann JD, Mascher T. 2006. Regulation of LiaRS-dependent gene  
643 expression in *Bacillus subtilis*: identification of inhibitor proteins, regulator binding sites,  
644 and target genes of a conserved cell envelope stress-sensing two-component system. *J.*  
645 *Bacteriol.* 188:5153–5166.
- 646 Jovanovic G, Weiner L, Model P. 1996. Identification, nucleotide sequence, and  
647 characterization of PspF, the transcriptional activator of the *Escherichia coli* stress-  
648 induced *psp* operon. *J. Bacteriol.* 178:1936–1945.
- 649 Karimova G, Pidoux J, Ullmann A, Ladant D. 1998. A bacterial two-hybrid system based on a  
650 reconstituted signal transduction pathway. *Proceedings of the National Academy of*  
651 *Sciences* 95:5752–5756.
- 652 Katoh K, Rozewicki J, Yamada KD. 2017. MAFFT online service: multiple sequence  
653 alignment, interactive sequence choice and visualization. *Brief. Bioinformatics* 30:3059–  
654 1166.
- 655 Kelley LA, Mezulis S, Yates CM, Wass MN, Sternberg MJE. 2015. The Phyre2 web portal for  
656 protein modeling, prediction and analysis. *Nat Protoc* 10:845–858.
- 657 Kleerebezem M, Crielaard W, Tommassen J. 1996. Involvement of stress protein PspA  
658 (phage shock protein A) of *Escherichia coli* in maintenance of the protonmotive force  
659 under stress conditions. *EMBO J.* 15:162–171.
- 660 Kleine B, Chattopadhyay A, Polen T, Pinto D, Mascher T, Bott M, Brocker M, Freudl R. 2017.  
661 The three-component system EsrISR regulates a cell envelope stress response in  
662 *Corynebacterium glutamicum*. *Mol. Microbiol.* 106:719–741.
- 663 Kobayashi H, Yamamoto M, Aono R. 1998. Appearance of a stress-response protein, phage-  
664 shock protein A, in *Escherichia coli* exposed to hydrophobic organic solvents.  
665 *Microbiology* 144 ( Pt 2):353–359.
- 666 Koonin EV, Mushegian AR. 1996. Complete genome sequences of cellular life forms:  
667 glimpses of theoretical evolutionary genomics. *Curr Opin Genet Dev* 6:757–762.
- 668 Letunic I, Bork P. 2019. Interactive Tree Of Life (iTOL) v4: recent updates and new  
669 developments. *Nucleic Acids Res.* 47:W256–W259.
- 670 Lin J-S, Lai E-M. 2017. Protein-Protein Interactions: Yeast Two-Hybrid System. *Methods*  
671 *Mol. Biol.* 1615:177–187.
- 672 Lopez D, Koch G. 2017. Exploring functional membrane microdomains in bacteria: an  
673 overview. *Current Opinion in Microbiology* 36:76–84.
- 674 Manganelli R, Gennaro ML. 2017. Protecting from Envelope Stress: Variations on the Phage-  
675 Shock-Protein Theme. *Trends Microbiol.* 25:205–216.
- 676 Mascher T, Margulis NG, Wang T, Ye RW, Helmann JD. 2003. Cell wall stress responses in  
677 *Bacillus subtilis*: the regulatory network of the bacitracin stimulon. *Mol. Microbiol.*  
678 50:1591–1604.
- 679 Mascher T, Zimmer SL, Smith T-A, Helmann JD. 2004. Antibiotic-inducible promoter  
680 regulated by the cell envelope stress-sensing two-component system LiaRS of *Bacillus*  
681 *subtilis*. *Antimicrob. Agents Chemother.* 48:2888–2896.
- 682 Maxson ME, Darwin AJ. 2006. Multiple promoters control expression of the *Yersinia*  
683 *enterocolitica* phage-shock-protein A (*pspA*) operon. *Microbiology* 152:1001–1010.

- 684 Mendler K, Chen H, Parks DH, Lobb B, Hug LA, Doxey AC. 2019. AnnoTree: visualization  
685 and exploration of a functionally annotated microbial tree of life. *Nucleic Acids Res.*  
686 47:4442–4448.
- 687 Moreno-Hagelsieb G, Collado-Vides J. 2002. A powerful non-homology method for the  
688 prediction of operons in prokaryotes. *Bioinformatics* 18 Suppl 1:S329–S336.
- 689 Moreno-Hagelsieb G, Janga SC. 2008. Operons and the effect of genome redundancy in  
690 deciphering functional relationships using phylogenetic profiles. *Proteins Struct Funct*  
691 *Bioinform* 70:344–352.
- 692 Neuwald AF, Aravind L, Spouge JL, Koonin EV. 1999. AAA+: A class of chaperone-like  
693 ATPases associated with the assembly, operation, and disassembly of protein  
694 complexes. *Genome Res.* 9:27–43.
- 695 Ortega DR, Zhulin IB. 2016. Evolutionary Genomics Suggests That CheV Is an Additional  
696 Adaptor for Accommodating Specific Chemoreceptors within the Chemotaxis Signaling  
697 Complex. Punta M, editor. *PLoS Comput Biol* 12:e1004723.
- 698 Overbeek R, Fonstein M, D'Souza M, Pusch GD, Maltsev N. 1999. The use of gene clusters  
699 to infer functional coupling. *Proc National Acad Sci* 96:2896–2901.
- 700 Parks DH, Chuvochina M, Waite DW, Rinke C, Skarshewski A, Chaumeil P-A, Hugenholtz P.  
701 2018. A standardized bacterial taxonomy based on genome phylogeny substantially  
702 revises the tree of life. *Nat. Biotechnol.* 36:996–1004.
- 703 Radeck J, Gebhard S, Orchard PS, Kirchner M, Bauer S, Mascher T, Fritz G. 2016. Anatomy  
704 of the bacitracin resistance network in *Bacillus subtilis*. *Mol. Microbiol.* 100.
- 705 Ravi J, Anantharaman V, Aravind L, Gennaro ML. 2018. Variations on a theme: evolution of  
706 the phage-shock-protein system in Actinobacteria. *Antonie Van Leeuwenhoek* 111:753–  
707 760.
- 708 Salgado H, Moreno-Hagelsieb G, Smith TF, Collado-Vides J. 2000. Operons in *Escherichia*  
709 *coli*: genomic analyses and predictions. *Proceedings of the National Academy of*  
710 *Sciences* 97:6652–6657.
- 711 Sambrook J, Russell DW. 2001. *Molecular Cloning*. CSHL Press
- 712 Silhavy TJ, Kahne D, Walker S. 2010. The bacterial cell envelope. *Cold Spring Harb*  
713 *Perspect Biol* 2:a000414–a000414.
- 714 Stasi M, De Luca M, Bucci C. 2015. Two-hybrid-based systems: powerful tools for  
715 investigation of membrane traffic machineries. *Journal of Biotechnology* 202:105–117.
- 716 Strahl H, Errington J. 2017. Bacterial Membranes: Structure, Domains, and Function. *Annu.*  
717 *Rev. Microbiol.* 71:519–538.
- 718 Strong M, Mallick P, Pellegrini M, Thompson MJ, Eisenberg D. 2003. Inference of protein  
719 function and protein linkages in *Mycobacterium tuberculosis* based on prokaryotic  
720 genome organization: a combined computational approach. *Genome Biol.* 4:R59–16.
- 721 Tsubouchi T, Mori K, Miyamoto N, Fujiwara Y, Kawato M, Shimane Y, Usui K, Tokuda M,  
722 Uemura M, Tame A, et al. 2015. *Aneurinibacillus tyrosinisolvens* sp. nov., a tyrosine-  
723 dissolving bacterium isolated from organics- and methane-rich seafloor sediment. *Int. J.*  
724 *Syst. Evol. Microbiol.* 65:1999–2005.



- 725 Ulrich LE, Koonin EV, Zhulin IB. 2005. One-component systems dominate signal  
726 transduction in prokaryotes. *Trends Microbiol.* 13:52–56.
- 727 Vothknecht UC, Otters S, Hennig R, Schneider D. 2012. Vipp1: a very important protein in  
728 plastids?! *J Exp Bot* 63:1699–1712.
- 729 Waterhouse AM, Procter JB, Martin DMA, Clamp M, Barton GJ. 2009. Jalview Version 2--a  
730 multiple sequence alignment editor and analysis workbench. *Bioinformatics* 25:1189–  
731 1191.
- 732 Weiner L, Brissette JL, Model P. 1991. Stress-induced expression of the *Escherichia coli*  
733 phage shock protein operon is dependent on sigma 54 and modulated by positive and  
734 negative feedback mechanisms. *Genes Dev.* 5:1912–1923.
- 735 Weiner L, Model P. 1994. Role of an *Escherichia coli* stress-response operon in stationary-  
736 phase survival. *Proceedings of the National Academy of Sciences* 91:2191–2195.
- 737 Wells JN, Bergendahl LT, Marsh JA. 2016. Operon Gene Order Is Optimized for Ordered  
738 Protein Complex Assembly. *Cell Rep* 14:679–685.
- 739 Wheelan SJ, Marchler-Bauer A, Bryant SH. 2000. Domain size distributions can predict  
740 domain boundaries. *Bioinformatics* 16:613–618.
- 741 Wiegert T, Homuth G, Versteeg S, Schumann W. 2001. Alkaline shock induces the *Bacillus*  
742 *subtilis* sigma(W) regulon. *Mol. Microbiol.* 41:59–71.
- 743 Wolf D, Domínguez-Cuevas P, Daniel RA, Mascher T. 2012. Cell envelope stress response  
744 in cell wall-deficient L-forms of *Bacillus subtilis*. *Antimicrob. Agents Chemother.* 56:5907–  
745 5915.
- 746 Wolf D, Kalamorz F, Wecke T, Juszczak A, Mäder U, Homuth G, Jordan S, Kirstein J,  
747 Hoppert M, Voigt B, et al. 2010. In-depth profiling of the LiaR response of *Bacillus*  
748 *subtilis*. *J. Bacteriol.* 192:4680–4693.
- 749 Wolf YI, Rogozin IB, Kondrashov AS, Koonin EV. 2001. Genome Alignment, Evolution of  
750 Prokaryotic Genome Organization, and Prediction of Gene Function Using Genomic  
751 Context. *Genome Res* 11:356–372.
- 752 Xu D, Nussinov R. 1998. Favorable domain size in proteins. *Fold Des* 3:11–17.
- 753 Yamaguchi S, Darwin AJ. 2012. Recent findings about the *Yersinia enterocolitica* phage  
754 shock protein response. *J. Microbiol.* 50:1–7.

755

## 756 **Figure Legends**

757

758 **Figure 1: The phage shock protein response in *E. coli*.** Upon stimulus perception mediated  
759 by the signal detectors PspB and PspC, PspA oligomerizes and presumably supports  
760 membrane integrity at site of damage perception. Transition of PspA polymerization state  
761 (either mediated by or independent of PspB/C) causes release of the transcriptional regulator

762 PspF, enabling transcription of the *pspA-E* operon. In *E. coli*, the orphan *pspG* gene is the only  
763 other known target of PspF, however its biological function within the PSP response is still  
764 unknown.

765

766 **Figure 2: Phylogenetic diversification of PSPs in bacteria and archaea. A** Phylogenetic  
767 representation of bacterial and archaeal phyla (phylogenetic tree adapted from AnnoTree  
768 (Mendler et al. 2019). Inner circle represents a scale indicating the number of analyzed  
769 genomes per phylum. Black/white circles highlight abundance of genomes harboring any PSP.  
770 Most outer squares show PSP domains found across all genomes of the respective phylum.  
771 For comprehensive dataset see Table S1. **B** A phylogenetic tree applying neighbor-joining  
772 algorithm based on concatenated proteins (Parks et al. 2018) of randomly selected  
773 representatives within the order of Gammaproteobacteria is shown. Genomes were screened  
774 for PSP domain presence (Table S2, Materials and Methods). **C** Phylogenetic tree using the  
775 maximum-likelihood algorithm based on concatenated proteins (Parks et al. 2018) of genomes  
776 within the Enterobacteriaceae family is displayed. Representatives were probed for presence  
777 of PSP domains (Table S3).

778

779 **Figure 3: PSP profiles resolved on genomic level. A** Screening of the full dataset for PSP  
780 domains presence/absence and their relative abundance (Table S1). **B** Descending categories  
781 of genomes according to found PSP domain profiles. Abundance was set relative to PSP  
782 positive genomes in **A** (Table S4). **C** In-depth analysis of PspA or C and PspAC containing  
783 genomes probed for abundance of multiple proteins per genome containing further PspA or C  
784 domains (Table S5).

785

786 **Figure 4: Protein length analysis of PspA and PspC. A, B** Amino acid length distribution of  
787 PspA and C proteins found in depicted phyla. Phyla with more than ten proteins were  
788 considered (Table S6 and S7). **C** Multiple sequence alignment of C-terminal conserved regions

789 of PspC proteins within Bacteriodota and Firmicutes. Proteins were considered as highlighted  
790 in **B** (Table S8 and File S1).

791

792 **Figure 5: Gene neighborhood analysis of PspA and PspC. A, B** Consensus gene  
793 neighborhood for PspA and C proteins based on domain abundance within depicted phyla.  
794 Black/white column indicates fraction of respective proteins encoded in operons dependent on  
795 the total amount of proteins accounted for (number next to column). For details see Material  
796 and Methods section and Tables S9 and S10.

797

798 **Figure 6: PSP network in *B. subtilis*. A** Genomic organization of the PSP network across  
799 three separate operons in the *B. subtilis* genome. **B** Representative B2H interactions of *B.*  
800 *subtilis* PSP network proteins. (For full dataset see Figures S1 and S2). **C** Schematic  
801 representation of the B2H results, comprising all members of the PSP network in *B. subtilis*.  
802 Protein domains are indicated by color and protein-protein interaction highlighted as full or in  
803 case for partial interaction as dotted arrows.

804

805 **Figure 7: PSP network predictions.** Phylum specific *in silico* predictions of PspA and PspC  
806 networks. Potential protein-protein interactions are indicated by arrows and physiological roles  
807 are implied. Data derives from gene neighborhood, HMM scan and THMM analyses, for full  
808 dataset see Table S12.

809

810

811

812

813

814

815

816

817

818 **Figures**

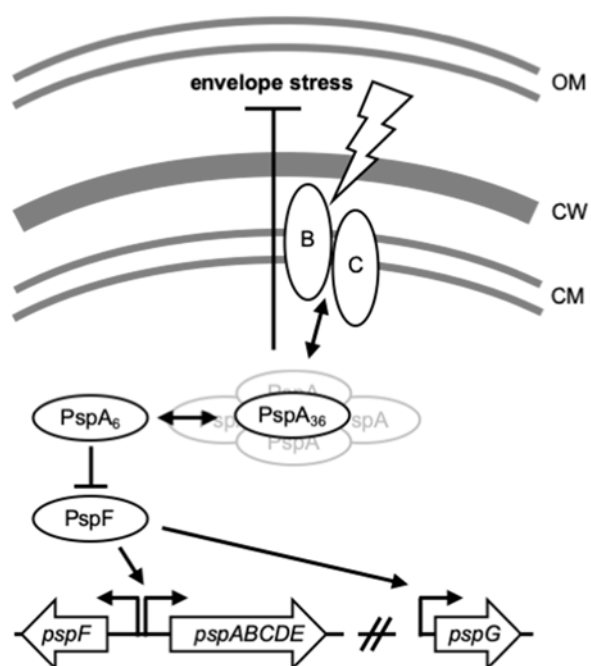

819

820 Figure 1

821

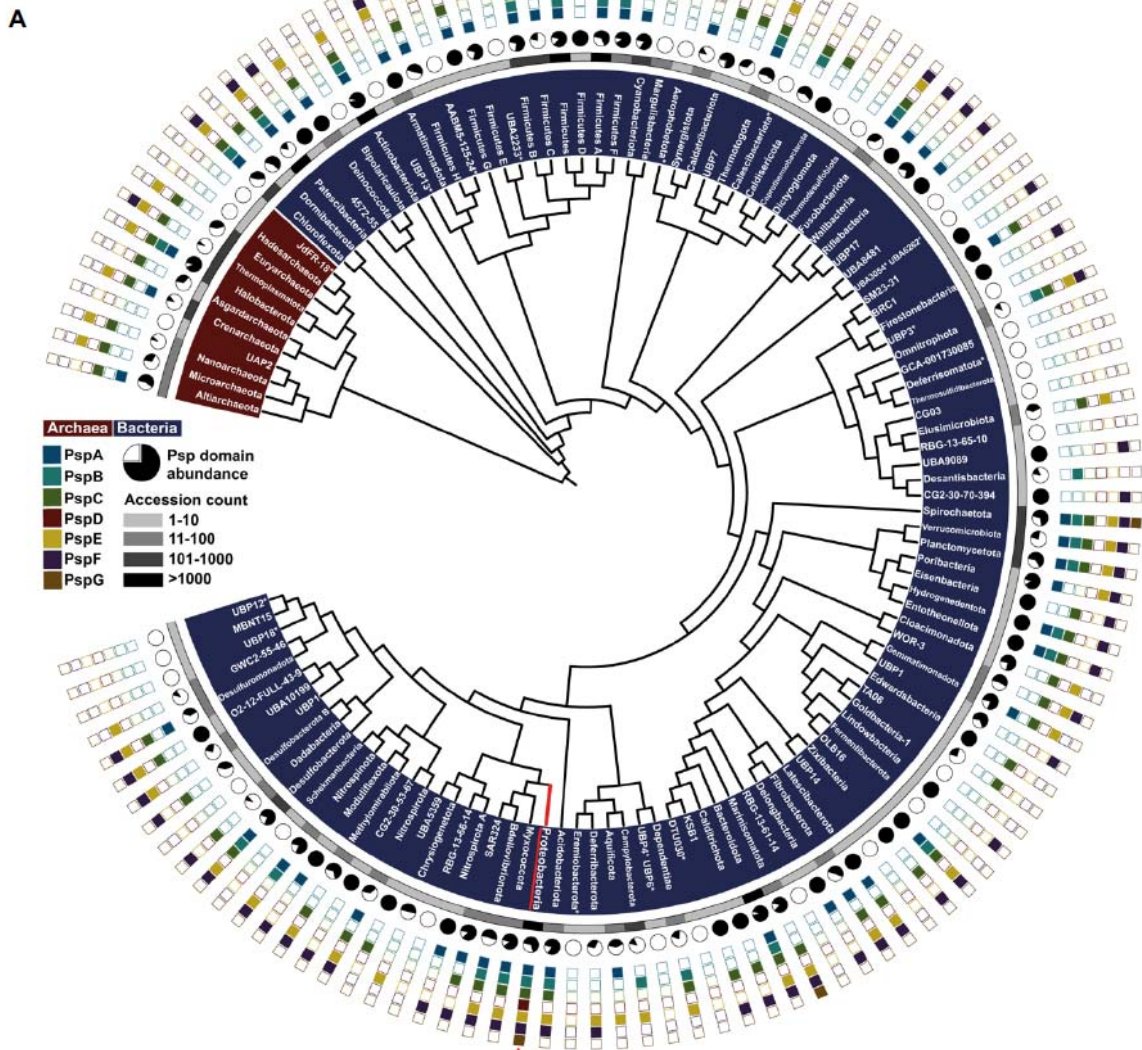

822

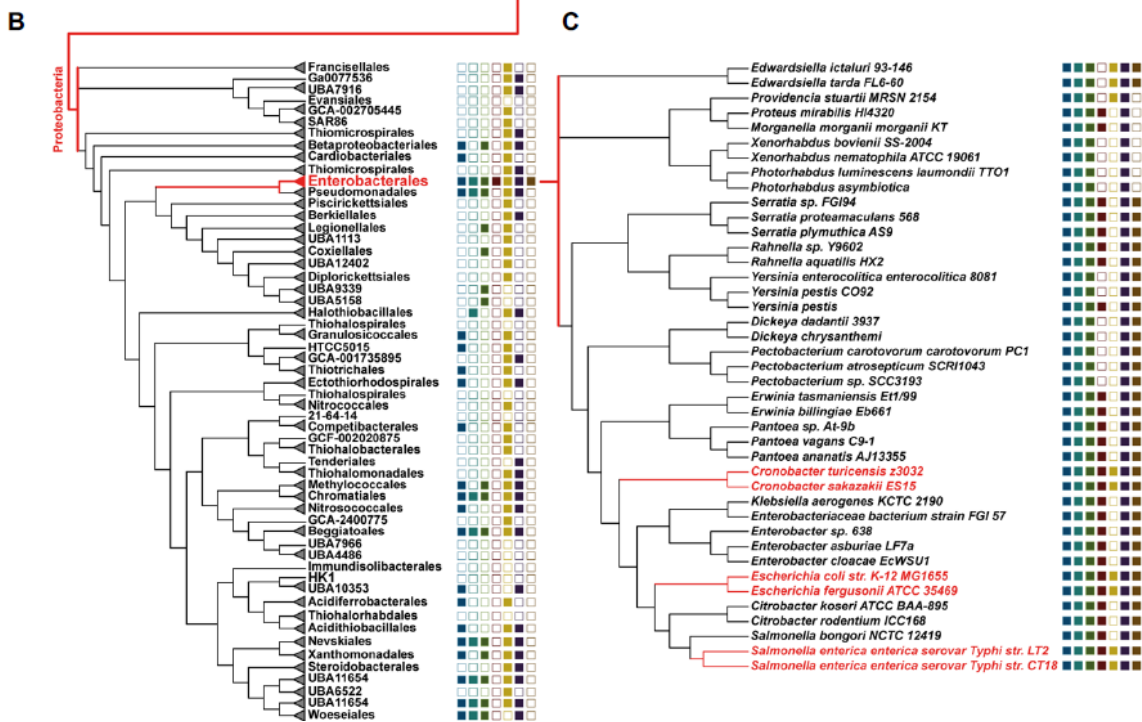

823

824 Figure 2

825

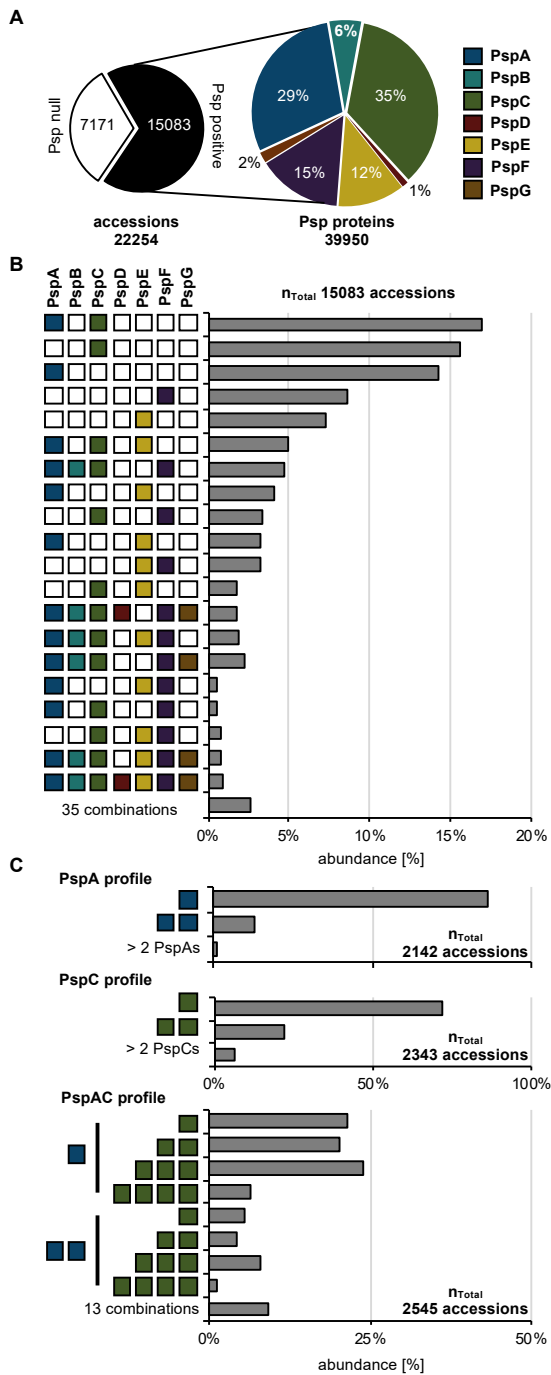

826

827 Figure 3

828

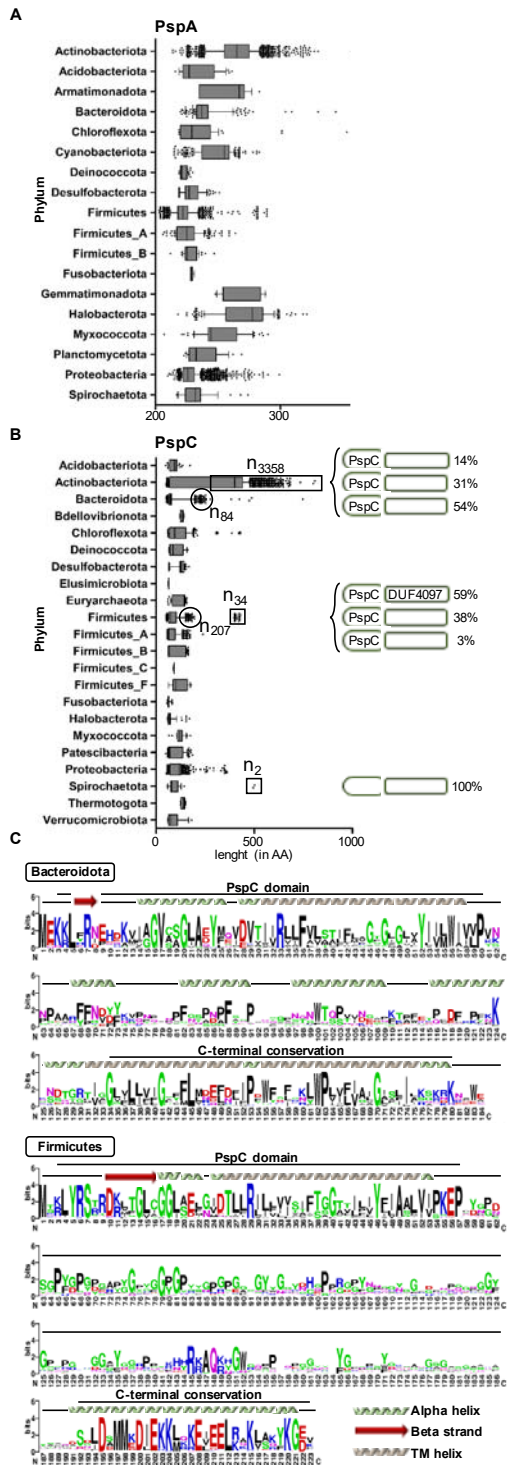

829

830 Figure 4

831

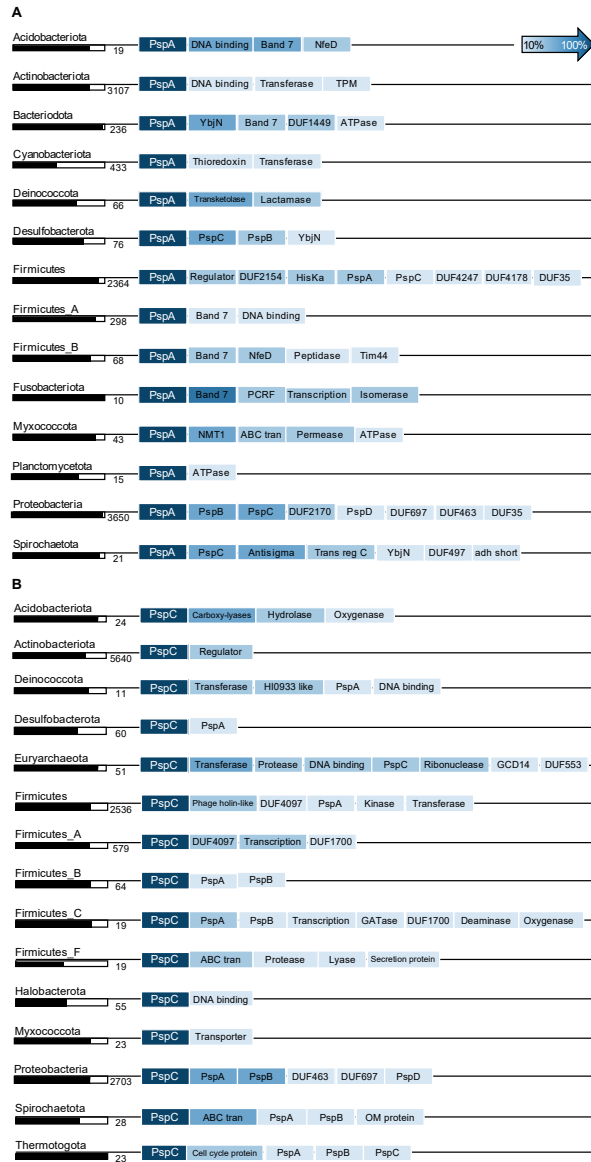

832

833 Figure 5

834



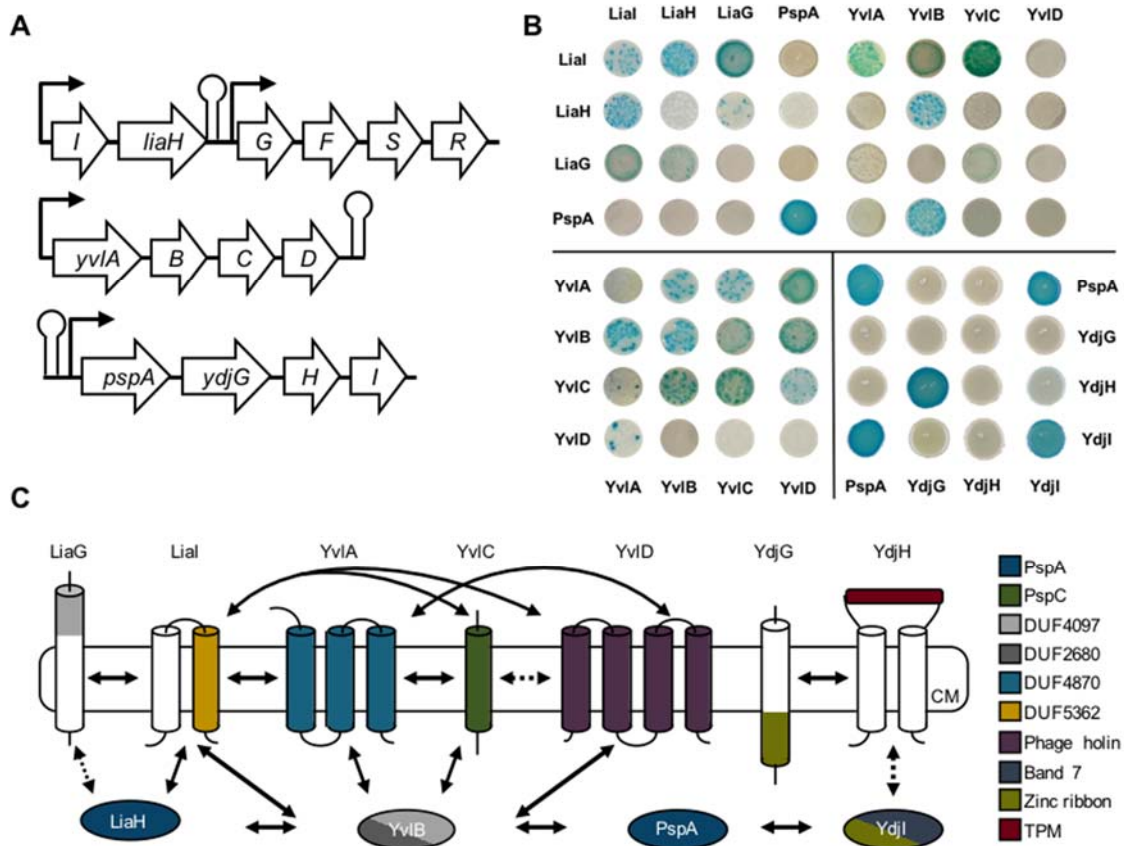

835

836 Figure 6

837

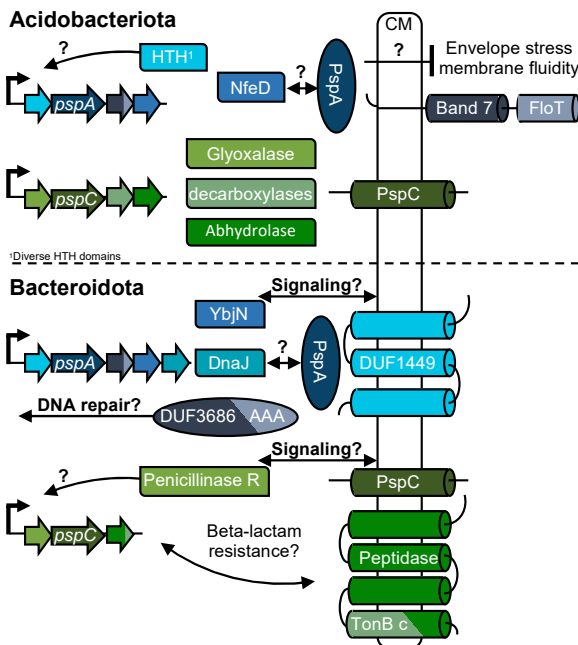

838

839 Figure 7

840
